# Supplementary material for: Unraveling tropical Indian Ocean influences on El Niño-driven Northwest Pacific anomalous anticyclone projections under global warming
Source: Research Square preprint supplement (doi:10.21203/rs.3.rs-6883441/v1), 2025-06-16
Supplement: Supplementary file 1 [file ef70165dd6f37415f2b26154.pdf]

**Supplementary Information for**  
**Unraveling tropical Indian Ocean influences on El Niño-driven Northwest**  
**Pacific anomalous anticyclone projections under global warming**

Wenping Jiang<sup>\*1,2,3</sup>, Ping Huang<sup>4,5</sup>, Jin-Yi Yu<sup>3</sup>, Xiangzhou Song<sup>1,2</sup>, Mengyan Chen<sup>6</sup>, Gang  
Huang<sup>4,7</sup>

<sup>1</sup>Key Laboratory of Marine Hazards Forecasting, Ministry of Natural Resources (MNR), Hohai  
University, Nanjing, China.

<sup>2</sup>College of Oceanography, Hohai University, Nanjing 210098, China

<sup>3</sup>Department of Earth System Science, University of California, Irvine, CA, USA.

<sup>4</sup>National Key Laboratory of Earth System Numerical Modeling and Application, Institute of  
Atmospheric Physics, Chinese Academy of Sciences, Beijing 100029, China.

<sup>5</sup>Center for Monsoon System Research, Institute of Atmospheric Physics, Chinese Academy of  
Sciences, Beijing, China.

<sup>6</sup>State Key Laboratory of Tropical Oceanography, South China Sea Institute of Oceanology,  
Chinese Academy of Sciences, Guangzhou, China.

<sup>7</sup>University of Chinese Academy of Sciences, Beijing 100049, China.

**Contents of this file**

Supplementary Figure 1 to 3

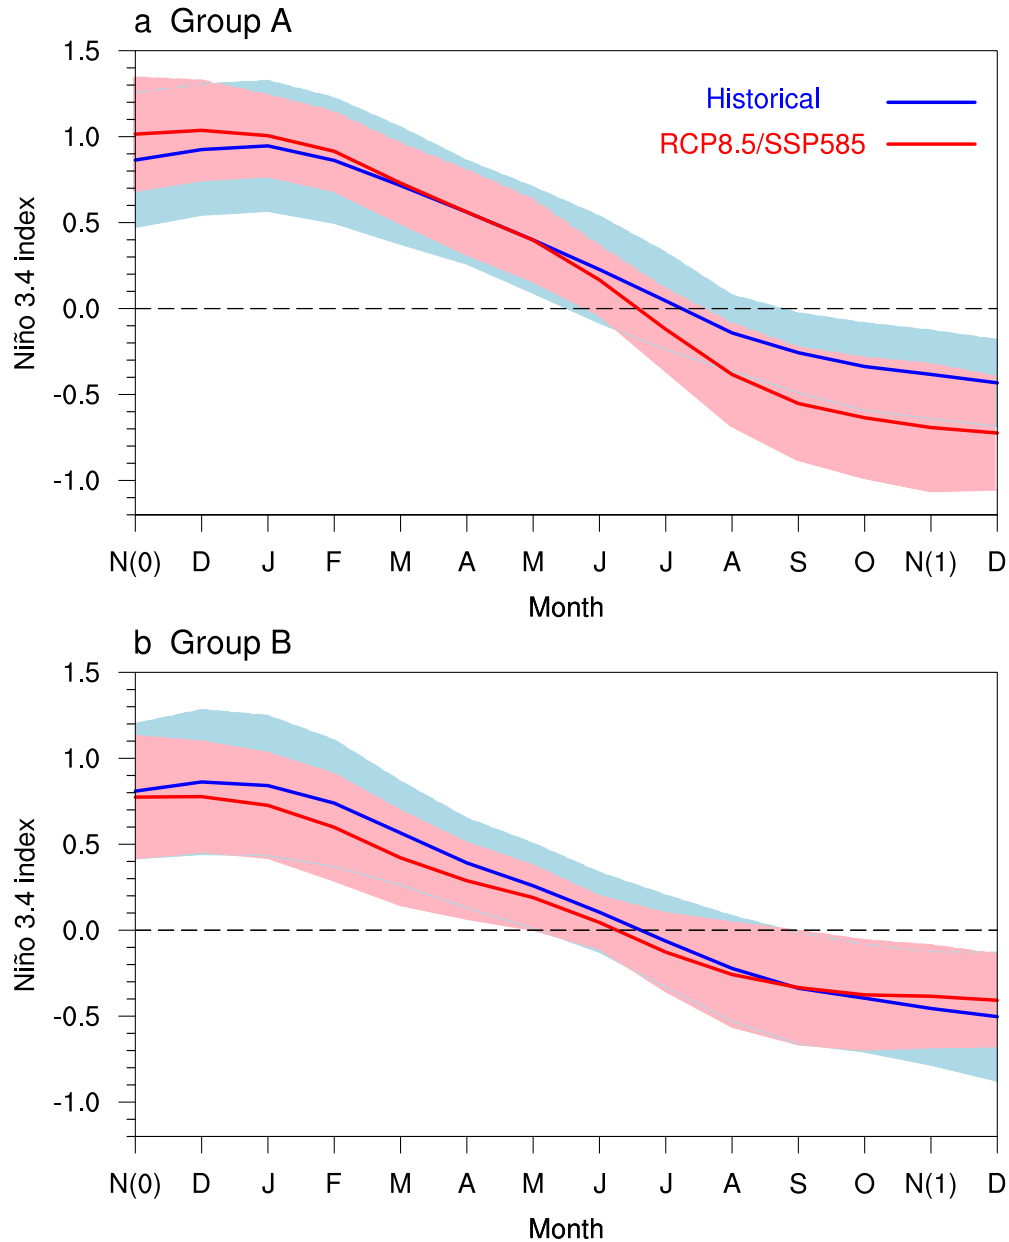

20

21 **Supplementary Figure 1** El Niño evolution respresented by Niño3.4 index. Years with the  
 22 D(0)JF(1) Niño3.4 index that exceed 0.5 standard deviation are selected for each model. **a** Group  
 23 A; **b** Group B. The blue (red) lines represent the historical (RCP8.5/SSP585) experiments. The  
 24 solid lines and the shadings show the mean and 1 standard deviation of models spread in each  
 25 group.

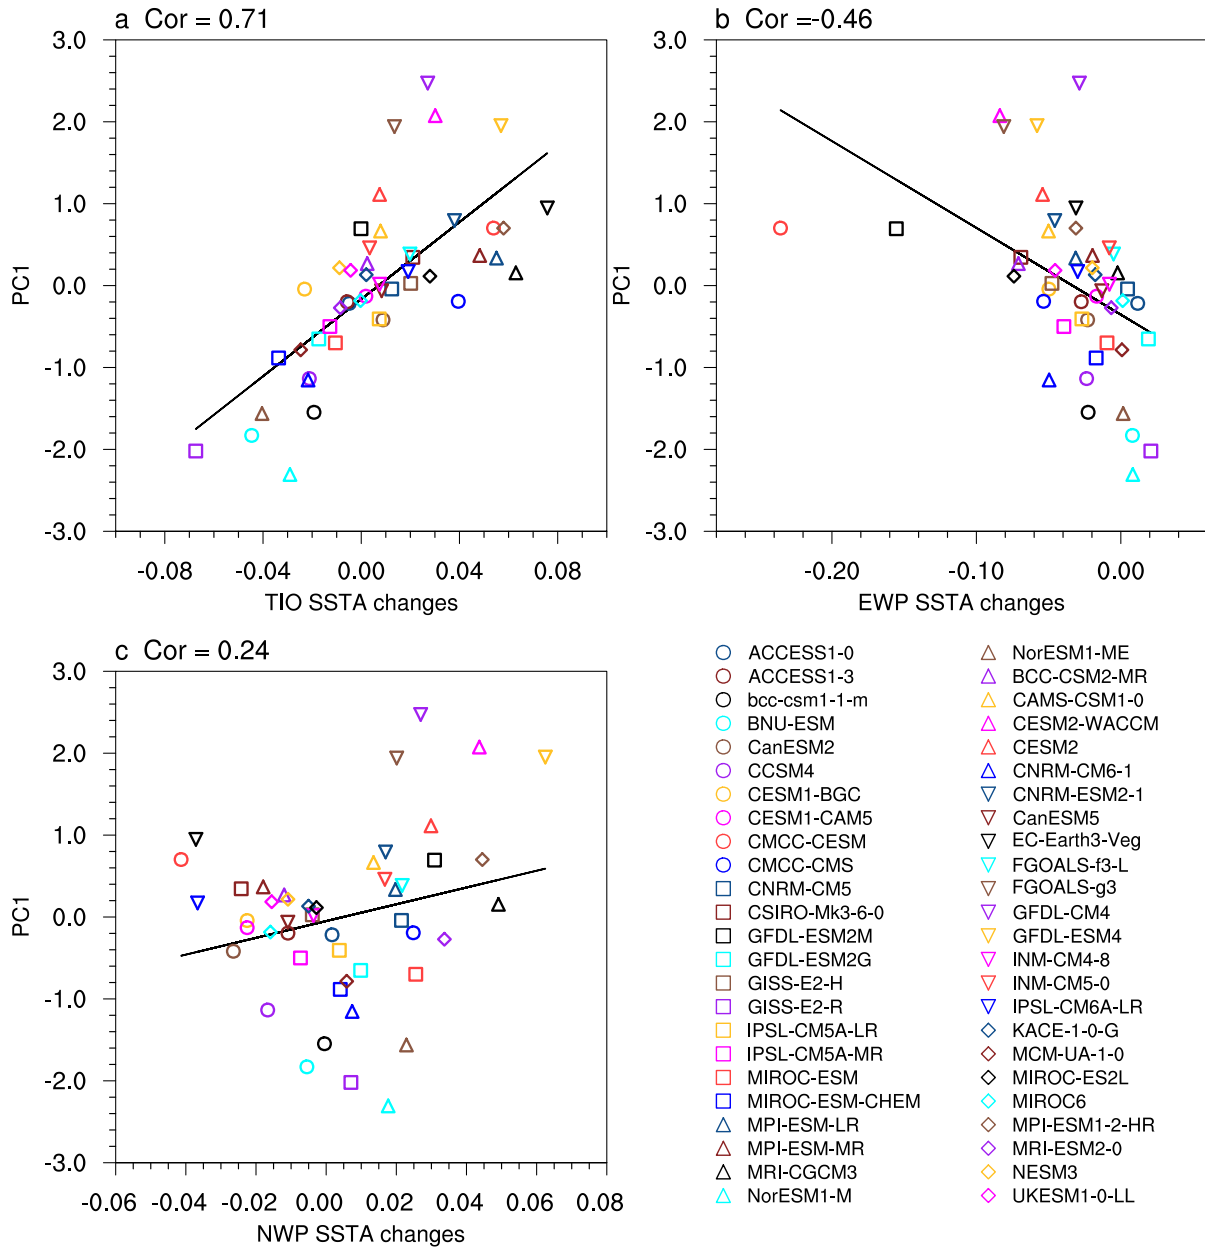

26

27 **Supplementary Figure 2** Same as Fig. 4, but for ENSO-related variability with the influence  
 28 of ENSO amplitude taken into account.

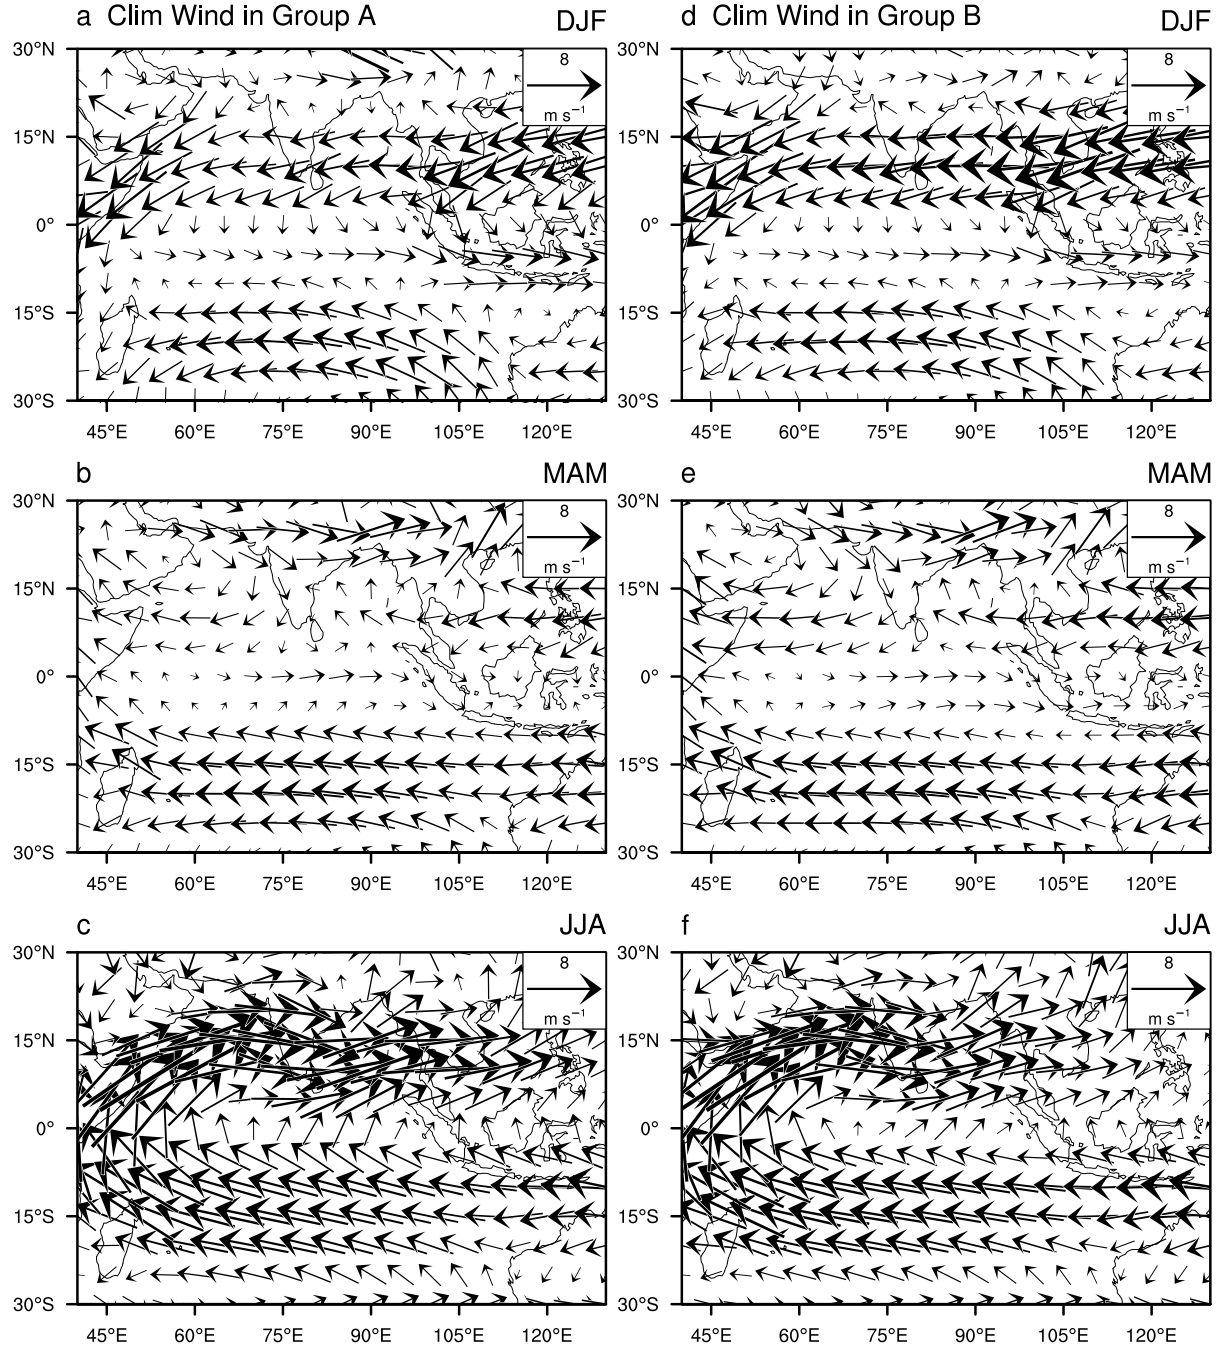

29

30 **Supplementary Figure 3** Future climatological wind fields over the Indian Ocean from winter  
 31 (DJF) to summer (JJA) in two groups.
